# Supplementary material
Source: publisher figshare collection journal article supplement (https://sage.figshare.com/ndownloader/files/36009512)
Supplement: Supplementary file 1 [file 36009512]

| **Sex: Male** | | **Total Instances Observed** | | | **Incidence Range** | | |
| --- | --- | --- | --- | --- | --- | --- | --- |
| **Tissue** | **Observation** | **Cambodian** | **Chinese** | **Vietnamese** | **Cambodian** | **Chinese** | **Vietnamese** |
| Brain | Cavitation | - | 1 (0.16%), N=615 | - | - | [0-11.11%] | - |
| Gliosis | - | 4 (0.65%), N=615 | - | - | [0-25.00%] | - |
| Hydrocephalus | 1 (0.5%), N=201 | - | - | [0-16.67%] | - | - |
| Infiltrate, (Mononuclear Cell) | 19 (9.45%), N=201 | 44 (7.15%), N=615 | 9 (9.18%), N=98 | [0-57.14%] | [0-75.00%] | [0-60.00%] |
| Inflammation | 2 (1%), N=201 | 7 (1.14%), N=615 | - | [0-40.00%] | [0-60.00%] | - |
| Mineralization | 2 (1%), N=201 | 5 (0.81%), N=615 | - | [0-33.33%] | [0-33.33%] | - |
| Pigment | - | 2 (0.33%), N=615 | - | - | [0-33.33%] | - |
| Eye | Cyst | - | 1 (0.17%), N=594 | - | - | [0-33.33%] | - |
| Degeneration (Lens) | 1 (0.44%), N=227 | 2 (0.34%), N=594 | - | [0-16.67%] | [0-20.00%] | - |
| Erosion/Ulcer | - | 2 (0.34%), N=594 | - | - | [0-33.33%] | - |
| Infiltrate, (Mononuclear Cell) | 11 (4.85%), N=227 | 17 (2.86%), N=594 | 2 (2.04%), N=98 | [0-60.00%] | [0-50.00%] | [0-33.33%] |
| Mineralization | 1 (0.44%), N=227 | - | - | [0-16.67%] | - | - |
| Retinal Fold/Retinal Rosette | - | 1 (0.17%), N=594 | - | - | [0-16.67%] | - |
| Eye, Optic Nerve | Atrophy/Hypercellular, Hemilateral | - | 4 (0.69%), N=583 | - | - | [0-33.33%] | - |
| Nerve, Sciatic | Degeneration/Necrosis | 2 (0.98%), N=205 | 6 (0.99%), N=604 | 1 (1.01%), N=99 | [0-25.00%] | [0-66.67%] | [0-16.67%] |
| Hemorrhage | - | 1 (0.17%), N=604 | - | - | [0-25.00%] | - |
| Infiltrate, (Eosinophils) | 1 (0.49%), N=205 | - | - | [0-14.29%] | - | - |
| Infiltrate, (Mononuclear Cell) | 3 (1.46%), N=205 | 10 (1.66%), N=604 | 5 (5.05%), N=99 | [0-16.67%] | [0-25.00%] | [0-25.00%] |
| Inflammation | 1 (0.49%), N=205 | 8 (1.32%), N=604 | 2 (2.02%), N=99 | [0-20.00%] | [0-33.33%] | [0-20.00%] |
| Pituitary Gland | Cyst | 5 (2.25%), N=222 | 20 (3.42%), N=585 | - | [0-33.33%] | [0-66.67%] | - |
| Gliosis | - | 1 (0.17%), N=585 | - | - | [0-10.00%] | - |
| Infiltrate, (Mononuclear Cell) | - | 6 (1.03%), N=585 | - | - | [0-33.33%] | - |
| Inflammation | - | 1 (0.17%), N=585 | - | - | [0-20.00%] | - |
| Mineralization | - | 1 (0.17%), N=585 | - | - | [0-20.00%] | - |
| Spinal Cord | Degeneration/Necrosis | - | 6 (0.99%), N=605 | - | - | [0-83.33%] | - |
| Fibrosis | - | 2 (0.33%), N=605 | - | - | [0-33.33%] | - |
| Gliosis | - | 1 (0.17%), N=605 | - | - | [0-16.67%] | - |
| Infiltrate, (Mononuclear Cell) | - | 7 (1.16%), N=605 | - | - | [0-25.00%] | - |
| Inflammation | - | 2 (0.33%), N=605 | - | - | [0-20.00%] | - |
| Vacuolation | - | 1 (0.17%), N=605 | - | - | [0-25.00%] | - |

| **Sex: Female** | | **Total Instances Observed** | | | **Incidence Range** | | |
| --- | --- | --- | --- | --- | --- | --- | --- |
| **Tissue** | **Observation** | **Cambodian** | **Chinese** | **Vietnamese** | **Cambodian** | **Chinese** | **Vietnamese** |
| Brain | Anomaly (Developmental) | - | 1 (0.16%), N=611 | - | - | [0-16.67%] | - |
| Cyst | 1 (0.52%), N=194 | - | - | [0-12.50%] | - | - |
| Fibrosis | - | 1 (0.16%), N=611 | - | - | [0-16.67%] | - |
| Gliosis | 1 (0.52%), N=194 | 3 (0.49%), N=611 | - | [0-14.29%] | [0-25.00%] | - |
| Infiltrate, (Mononuclear Cell) | 19 (9.79%), N=194 | 45 (7.36%), N=611 | 5 (5.1%), N=98 | [0-50.00%] | [0-100.00%] | [0-40.00%] |
| Inflammation | - | 6 (0.98%), N=611 | - | - | [0-40.00%] | - |
| Macrophages | - | 1 (0.16%), N=611 | 2 (2.04%), N=98 | - | [0-16.67%] | [0-33.33%] |
| Mineralization | 2 (1.03%), N=194 | 6 (0.98%), N=611 | - | [0-66.67%] | [0-33.33%] | - |
| Pigment | - | 2 (0.33%), N=611 | - | - | [0-25.00%] | - |
| Vacuolation | 1 (0.52%), N=194 | - | - | [0-16.67%] | - | - |
| Eye | Infiltrate, (Mononuclear Cell) | 6 (2.79%), N=215 | 18 (3.05%), N=590 | 3 (3.06%), N=98 | [0-60.00%] | [0-100.00%] | [0-25.00%] |
| Keratopathy | - | 1 (0.17%), N=590 | - | - | [0-25.00%] | - |
| Eye, Optic Nerve | Atrophy/Hypercellular, Hemilateral | - | 2 (0.35%), N=578 | - | - | [0-22.22%] | - |
| Infiltrate, (Mononuclear Cell) | - | 1 (0.17%), N=578 | - | - | [0-20.00%] | - |
| Nerve, Sciatic | Degeneration/Necrosis | - | 9 (1.5%), N=602 | 1 (1.02%), N=98 | - | [0-66.67%] | [0-16.67%] |
| Infiltrate, (Mononuclear Cell) | 1 (0.52%), N=194 | 6 (1%), N=602 | 1 (1.02%), N=98 | [0-20.00%] | [0-66.67%] | [0-16.67%] |
| Inflammation | - | 7 (1.16%), N=602 | - | - | [0-50.00%] | - |
| Thrombus | - | 1 (0.17%), N=602 | - | - | [0-25.00%] | - |
| Pituitary Gland | Cyst | 15 (7.01%), N=214 | 22 (3.77%), N=583 | 8 (8.16%), N=98 | [0-50.00%] | [0-40.00%] | [0-40.00%] |
| Gliosis | - | 1 (0.17%), N=583 | - | - | [0-33.33%] | - |
| Hypertrophy/Hyperplasia | - | 1 (0.17%), N=583 | - | - | [0-33.33%] | - |
| Infiltrate, (Mononuclear Cell) | 1 (0.47%), N=214 | 1 (0.17%), N=583 | - | [0-16.67%] | [0-20.00%] | - |
| Mineralization | - | 1 (0.17%), N=583 | - | - | [0-20.00%] | - |
| Pigment | 1 (0.47%), N=214 | - | - | [0-33.33%] | - | - |
| Spinal Cord | Degeneration/Necrosis | - | 4 (0.67%), N=598 | - | - | [0-66.67%] | - |
| Fibrosis | - | 3 (0.5%), N=598 | - | - | [0-50.00%] | - |
| Infiltrate, (Mononuclear Cell) | - | 3 (0.5%), N=598 | 1 (1.01%), N=99 | - | [0-16.67%] | [0-20.00%] |
| Inflammation | - | 1 (0.17%), N=598 | - | - | [0-16.67%] | - |
